# Supplementary material for: Risk Prediction Models for Kidney Cancer: A Systematic Review
Source: PubMed Central journal article supplement (PMC8642244; doi:10.1016/j.euf.2020.06.024), 2021-11
Supplement: mmc1.pdf [file mmc1.pdf]

Details of Development Studies – Supplementary Table 1

| First Author, Year | Study Type* | Study Setting                            | Country    | Method                                             | Selection of Variables                                                                                                                         | Period of Study                               | Follow-up Period | Data Collection Method     | Selection of Cases                                                              | Selection of Controls                                                                                                       | Selection of Cohort | Exclusions                                                                                                                                | Cases and controls |
|--------------------|-------------|------------------------------------------|------------|----------------------------------------------------|------------------------------------------------------------------------------------------------------------------------------------------------|-----------------------------------------------|------------------|----------------------------|---------------------------------------------------------------------------------|-----------------------------------------------------------------------------------------------------------------------------|---------------------|-------------------------------------------------------------------------------------------------------------------------------------------|--------------------|
| Shephard 2013      | CC          | Primary Care                             | UK         | Logistic Regression                                | Literature review. Stepwise selection procedure to choose most important variables.                                                            | 2000 - 2009                                   | -                | GP records (GPRD database) | Men and women aged >40 with at least 1 year of data prior to diagnosis.         | Healthy controls were matched to the cases by age ( $\pm 1$ year) and GP practise. Up to 5 controls were selected per case. | -                   | Metastatic cancer<br>Bladder cancer<br>Cases that could not be matched to a control<br>Controls with no data in year prior to study entry | 3149:14091         |
| Frantzi 2014       | CC          | Hospital (symptomatic individuals)       | UK and USA | Support Vector Machine Software (an ML classifier) | All detected peptides in urine samples, identified through mass spectral ion peaks.                                                            | 2003 - 2006 (cases)<br>2003 - 2011 (controls) | -                | Urine samples              | Individuals diagnosed with RCC after attending hospital for symptom assessment. | Healthy (symptomatic) controls were matched to cases by age, smoking status, BMI, HTN and recruitment centre.               | -                   | None given                                                                                                                                | 40:68              |
| Wu-Wang 2016       | CC          | Hospital                                 | China      | Logistic Regression                                | Drew lncRNAs associated with cancer from the lncRNA database. Variables retained if they were statistically significant and reliably detected. | Not given                                     | -                | Blood samples              | ccRCC patients about to undergo radical nephrectomy.                            | Healthy controls were matched to cases by age and sex.                                                                      | -                   | None given                                                                                                                                | 24:27              |
| Wu-Zhang 2016      | CC          | Hospital (cases)<br>Community (controls) | China      | Logistic Regression                                | SNPs were identified in a prior study.                                                                                                         | 2010 - 2014                                   | -                | Blood samples              | Individuals diagnosed with ccRCC at a hospital.                                 | Unclear                                                                                                                     | -                   | Kidney cancer other than RCC<br>Missing blood samples<br>Missing pathological diagnosis                                                   | 346:1130           |

|                       |     |                                      |                                                                              |                     |                                                                                                  |             |                    |                                |                                                           |                                                                                                                                                                            |   |                                               |         |
|-----------------------|-----|--------------------------------------|------------------------------------------------------------------------------|---------------------|--------------------------------------------------------------------------------------------------|-------------|--------------------|--------------------------------|-----------------------------------------------------------|----------------------------------------------------------------------------------------------------------------------------------------------------------------------------|---|-----------------------------------------------|---------|
| <b>Kim 2013a</b>      | CC  | Hospital (cases)<br>Mixed (controls) | Korea                                                                        | Logistic Regression | Risk factors drawn from a previous study, then a stepwise selection process was used.            | Not given   | -                  | Blood samples                  | Unclear                                                   | Unclear                                                                                                                                                                    | - | None given                                    | 87:102  |
| <b>Kim 2013b</b>      | CC  | Hospital (cases)<br>Mixed (controls) | Korea                                                                        | Logistic Regression | Risk factors drawn from a previous study, then a stepwise selection process was used.            | Not given   | -                  | Blood samples                  | Unclear                                                   | Unclear                                                                                                                                                                    | - | None given                                    | 87:102  |
| <b>Morrissey 2015</b> | CC  | Hospital                             | USA                                                                          | Logistic Regression | Risk factors drawn from a previous study, variables shown to be sensitive retained.              | 2012        | -                  | Urine samples                  | Individuals undergoing surgery to treat kidney cancer.    | Healthy individuals, selection process unclear.                                                                                                                            | - | None given                                    | 19:797  |
| <b>Scelo 2018a</b>    | NCC | Community                            | Denmark , France, Germany , Greece, Italy, Netherlands, Norway, UK and Spain | Logistic Regression | No details given                                                                                 | 1992 - 2000 | 5 years ( or more) | Questionnaire                  | All individuals within the EPIC cohort with incident RCC. | Controls were randomly chosen from members of the EPIC cohort who were free of cancer. They were also matched by country, sex, date of blood collection and date of birth. | - | No blood sample donated at study recruitment. | 189:190 |
| <b>Scelo 2018b</b>    | NCC | Community                            | Denmark , France, Germany , Greece, Italy, Netherlands, Norway, UK and Spain | Logistic Regression | Biomarker (KIM-1) was selected based on literature. No details given for the other risk factors. | 1992 - 2000 | 5 years ( or more) | Questionnaire and blood sample | All individuals within the EPIC cohort with incident RCC. | Controls were randomly chosen from members of the EPIC cohort who were free of cancer. They were also matched by country, sex, date of blood collection and date of birth. | - | No blood sample donated at study recruitment. | 189:191 |

|                          |       |              |    |                     |                                                                                                                                          |   |   |   |   |   |   |   |   |
|--------------------------|-------|--------------|----|---------------------|------------------------------------------------------------------------------------------------------------------------------------------|---|---|---|---|---|---|---|---|
| <b>Usher-Smith 2018a</b> | Other | Primary Care | UK | Logistic Regression | Risk factors selected from the European code against cancer. Included in the model if reliable self-reported measures could be obtained. | - | - | - | - | - | - | - | - |
| <b>Usher-Smith 2018b</b> | Other | Primary Care | UK | Logistic Regression | Risk factors selected from the European code against cancer. Included in the model if reliable self-reported measures could be obtained. | - | - | - | - | - | - | - | - |

\*CC (case-control study), NCC (nested case-control study), Ch (Cohort study)

**Details of Internal Validations – Supplementary Table 2**

| First Author, Year  | Validation Method         | Study Type* | Study Setting                        | Country    | Period of Study                               | Follow-up Period | Data Collection Method | Selection of Cases                                                              | Selection of Controls                                                                                         | Selection of Cohort | Exclusions | Differences with development cohort                                         | Cases and controls |
|---------------------|---------------------------|-------------|--------------------------------------|------------|-----------------------------------------------|------------------|------------------------|---------------------------------------------------------------------------------|---------------------------------------------------------------------------------------------------------------|---------------------|------------|-----------------------------------------------------------------------------|--------------------|
| <b>Frantzi 2014</b> | LOOCV <sup>‡</sup>        | CC          | Hospital                             | UK and USA | 2003 - 2006 (cases)<br>2003 - 2011 (controls) | -                | Urine samples          | Individuals diagnosed with RCC after attending hospital for symptom assessment. | Healthy (symptomatic) controls were matched to cases by age, smoking status, BMI, HTN and recruitment centre. | -                   | None given | Unclear                                                                     | 30:46              |
| <b>Wu-Wang 2016</b> | Random split-sampling     | CC          | Hospital                             | China      | Not given                                     | -                | Blood samples          | ccRCC patients about to undergo radical nephrectomy.                            | Healthy controls were matched to cases by age and sex.                                                        | -                   | None given | -                                                                           | 37:35              |
| <b>Kim 2013a</b>    | Non-random split sampling | CC          | Hospital (cases)<br>Mixed (controls) | Korea      | Not given                                     | -                | Blood samples          | Unclear                                                                         | Unclear                                                                                                       | -                   | None given | Individuals recruited later in the study period were in the validation set. | 27:73              |
| <b>Kim 2013b</b>    | Non-random split sampling | CC          | Hospital (cases)<br>Mixed (controls) | Korea      | Not given                                     | -                | Blood samples          | Unclear                                                                         | Unclear                                                                                                       | -                   | None given | Individuals recruited later in the study period were in the validation set. | 27:73              |

\*\*CC (case-control study), NCC (nested case-control study), Ch (Cohort study)

<sup>‡</sup>LOOCV (Leave-one-out Cross Validation)

**Details of External Validations – Supplementary Table 3**

| Initial Model (First Author, Year) | Validation Study (First Author, Year) | Comparison with development population                                                                                                            | Study Type* | Study Setting | Country | Period of Study | Follow-up           | Data Collection Method                                      | Selection of Cases | Selection of Controls                              | Selection of Cohort                                              | Exclusions                                                                                                                                                 | Cases and Controls |
|------------------------------------|---------------------------------------|---------------------------------------------------------------------------------------------------------------------------------------------------|-------------|---------------|---------|-----------------|---------------------|-------------------------------------------------------------|--------------------|----------------------------------------------------|------------------------------------------------------------------|------------------------------------------------------------------------------------------------------------------------------------------------------------|--------------------|
| <b>Usher-Smith 2018a</b>           | <b>Usher-Smith 2018a</b>              | There is no development cohort.                                                                                                                   | Ch          | Primary Care  | UK      | 1993-1998       | 10 years (at least) | Questionnaire (self-reporting). Used EPIC-Norfolk database. | -                  | -                                                  | Individuals in EPIC-Norfolk aged between 45 and 74               | Less than 10 years follow-up. Previous history or diagnosis of colorectal, lung, endometrial, oesophageal, breast, bladder or kidney cancer. Missing data. | 28:10912           |
| <b>Usher-Smith 2018b</b>           | <b>Usher-Smith 2018b</b>              | There is no development cohort.                                                                                                                   | Ch          | Primary care  | UK      | 1993-1998       | 10 years (at least) | Questionnaire (self-reporting). Used EPIC-Norfolk database. | -                  | -                                                  | Participants in the EPIC Norfolk cohort. Aged between 45 and 74. | Less than 10 years follow-up. Previous history or diagnosis of colorectal, lung, endometrial, oesophageal, breast, bladder or kidney cancer. Missing data. | 16:12812           |
| <b>Wu-Wang 2016</b>                | <b>Wu-Wang 2016</b>                   | Similar cases to the development study, however, the controls used in this validation all have benign tumours (as opposed to healthy individuals) | CC          | Hospital      | China   | not given       | not applicable      | Blood samples                                               | Not given          | All have benign tumours. No further details given. | -                                                                | Not given                                                                                                                                                  | 10:8               |

\*CC (case-control study), NCC (nested case-control study), Ch (Cohort study)





*Values in brackets are the 95% confidence intervals*

*\*sn (sensitivity), sp (specificity) and PPV (positive predictive value)*



|     | <b>Search Line</b>                                                                                         | <b>Results</b> |
|-----|------------------------------------------------------------------------------------------------------------|----------------|
| 1.  | ((renal or kidney* or nephric) adj6 (cancer* or neoplas* or tumo?r* or carcinom*)).mp.                     | 136040         |
| 2.  | ((clear adj3 cell* or papilla* or chromophob*) adj6 ((renal adj3 (carcinom* or cancer*)) or RCC)).mp.      | 12782          |
| 3.  | (transitional adj3 cell* adj3 (kidney* or ureter* or (renal adj3 pelvis))).mp.                             | 355            |
| 4.  | renal cell carcinoma.mp. or exp kidney carcinoma/ or exp renal cell carcinoma/ or exp kidney tumor/        | 117788         |
| 5.  | exp kidney cancer/                                                                                         | 95887          |
| 6.  | 1 or 2 or 3 or 4 or 5                                                                                      | 146295         |
| 7.  | exp bladder cancer/                                                                                        | 61547          |
| 8.  | exp bladder tumor/                                                                                         | 76887          |
| 9.  | ((squamous or adenocarcinom* or sarcom*) adj6 bladder).mp.                                                 | 3120           |
| 10. | ((bladder or (transitional adj3 cell*) or urotheli*) adj6 (cancer* or carcinom* or neplas* or tumo?r*)).mp | 107193         |
| 11. | 7 or 8 or 9 or 10                                                                                          | 108033         |
| 12. | exp ureter cancer/                                                                                         | 1743           |
| 13. | exp urinary tract cancer/                                                                                  | 168517         |
| 14. | exp ureter tumor/                                                                                          | 3456           |
| 15. | ((urete* or (urin* adj3 tract)) adj6 (cancer* or neoplas* or tumo?r* or carcinom*)).mp.                    | 19688          |
| 16. | 12 or 13 or 14 or 15                                                                                       | 175326         |
| 17. | 6 or 11 or 16                                                                                              | 248033         |
| 18. | exp cancer risk/ or risk*.mp. or exp risk/ or exp risk factor/ or exp risk assessment/                     | 3426020        |
| 19. | chance*.mp                                                                                                 | 106508         |
| 20. | exp probability/ or likelihood*.mp.                                                                        | 243289         |
| 21. | 18 or 19 or 20                                                                                             | 3668877        |
| 22. | exp mathematical model/ or model*.mp. or exp model/                                                        | 4282782        |
| 23. | exp prediction/ or predict*.mp.                                                                            | 1901360        |
| 24. | score.mp.                                                                                                  | 834337         |
| 25. | 22 or 23 or 24                                                                                             | 6131165        |
| 26. | review.pt.                                                                                                 | 2370125        |
| 27. | letter.pt.                                                                                                 | 1039991        |
| 28. | editorial.pt.                                                                                              | 583071         |
| 29. | 26 or 27 or 28                                                                                             | 3993187        |
| 30. | 17 and 21 and 25                                                                                           | 16334          |
| 31. | 30 not 29                                                                                                  | 14780          |
| 32. | limit 31 to yr="1980 -Current"                                                                             | 14707          |

MEDLINE Search

|     | <b>Search Line</b>                                                                                          | <b>Results</b> |
|-----|-------------------------------------------------------------------------------------------------------------|----------------|
| 1.  | exp Kidney Neoplasms/                                                                                       | 69548          |
| 2.  | exp Carcinoma, Renal Cell/ or renal cell carcinoma.mp.                                                      | 39835          |
| 3.  | ((renal or kidney* or nephric) adj6 (cancer* or neoplas* or tumo?r* or carcinom*)).mp.                      | 98273          |
| 4.  | ((clear adj3 cell* or papilla* or chromophob*) adj6 ((renal adj3 (carcinom* or cancer*)) or RCC)).mp.       | 8125           |
| 5.  | (transitional adj3 cell* adj6 (kidney* or ureter* or (renal adj3 pelvis))).mp.                              | 1067           |
| 6.  | 1 or 2 or 3 or 4 or 5                                                                                       | 100890         |
| 7.  | ((bladder or urotheli* or (transitional adj3 cell)) adj6 (cancer* or neoplas* or tumo?r* or carcinom*)).mp. | 75204          |
| 8.  | ((squamous or adenocarcinom* or sarcom*) adj6 bladder).mp.                                                  | 2322           |
| 9.  | 7 or 8                                                                                                      | 75455          |
| 10. | ((urete* or (urin* adj3 tract)) adj6 (cancer* or neoplas* or tumo?r* or carcinom*)).mp.                     | 10925          |
| 11. | 6 or 9 or 10                                                                                                | 171470         |
| 12. | exp cancer risk/ or risk*.mp. or exp risk/ or exp risk factor/ or exp risk assessment/                      | 2378774        |
| 13. | chance*.mp.                                                                                                 | 74752          |
| 14. | exp probability/ or likelihood*.mp.                                                                         | 1338933        |
| 15. | 12 or 13 or 14                                                                                              | 2630971        |
| 16. | exp mathematical model/ or model*.mp. or exp model/                                                         | 3440342        |
| 17. | exp prediction/ or predict*.mp.                                                                             | 1454906        |
| 18. | score.mp.                                                                                                   | 486328         |
| 19. | 16 or 17 or 18                                                                                              | 4716581        |
| 20. | review.pt.                                                                                                  | 2445033        |
| 21. | letter.pt.                                                                                                  | 1004201        |
| 22. | editorial.pt.                                                                                               | 471469         |
| 23. | 20 or 21 or 22                                                                                              | 3897304        |
| 24. | 11 and 15 and 19                                                                                            | 9531           |
| 25. | 24 not 23                                                                                                   | 8445           |
| 26. | limit 25 to yr="1980 -Current"                                                                              | 8431           |

EMBASE Search

|    | <b>Search Line</b>                                                                                    | <b>Results</b> |
|----|-------------------------------------------------------------------------------------------------------|----------------|
| 1. | ((renal or kidney* or nephric) adj6 (cancer* or neoplas* or tumo?r* or carcinom*)).mp.                | 136040         |
| 2. | ((clear adj3 cell* or papilla* or chromophob*) adj6 ((renal adj3 (carcinom* or cancer*)) or RCC)).mp. | 12782          |
| 3. | (transitional adj3 cell* adj3 (kidney* or ureter* or (renal adj3 pelvis))).mp.                        | 355            |
| 4. | renal cell carcinoma.mp. or exp kidney carcinoma/ or exp renal cell carcinoma/ or exp kidney tumor/   | 117788         |
| 5. | exp kidney cancer/                                                                                    | 95887          |

|     |                                                                                                            |         |
|-----|------------------------------------------------------------------------------------------------------------|---------|
| 6.  | 1 or 2 or 3 or 4 or 5                                                                                      | 146295  |
| 7.  | exp bladder cancer/                                                                                        | 61547   |
| 8.  | exp bladder tumor/                                                                                         | 76887   |
| 9.  | ((squamous or adenocarcinom* or sarcom*) adj6 bladder).mp.                                                 | 3120    |
| 10. | ((bladder or (transitional adj3 cell*) or urotheli*) adj6 (cancer* or carcinom* or neplas* or tumo?r*)).mp | 107193  |
| 11. | 7 or 8 or 9 or 10                                                                                          | 108033  |
| 12. | exp ureter cancer/                                                                                         | 1743    |
| 13. | exp urinary tract cancer/                                                                                  | 168517  |
| 14. | exp ureter tumor/                                                                                          | 3456    |
| 15. | ((urete* or (urin* adj3 tract)) adj6 (cancer* or neoplas* or tumo?r* or carcinom*)).mp.                    | 19688   |
| 16. | 12 or 13 or 14 or 15                                                                                       | 175326  |
| 17. | 6 or 11 or 16                                                                                              | 248033  |
| 18. | exp cancer risk/ or risk*.mp. or exp risk/ or exp risk factor/ or exp risk assessment/                     | 3426020 |
| 19. | chance*.mp                                                                                                 | 106508  |
| 20. | exp probability/ or likelihood*.mp.                                                                        | 243289  |
| 21. | 18 or 19 or 20                                                                                             | 3668877 |
| 22. | exp mathematical model/ or model*.mp. or exp model/                                                        | 4282782 |
| 23. | exp prediction/ or predict*.mp.                                                                            | 1901360 |
| 24. | score.mp.                                                                                                  | 834337  |
| 25. | 22 or 23 or 24                                                                                             | 6131165 |
| 26. | review.pt.                                                                                                 | 2370125 |
| 27. | letter.pt.                                                                                                 | 1039991 |
| 28. | editorial.pt.                                                                                              | 583071  |
| 29. | 26 or 27 or 28                                                                                             | 3993187 |
| 30. | 17 and 21 and 25                                                                                           | 16334   |
| 31. | 30 not 29                                                                                                  | 14780   |
| 32. | limit 31 to yr="1980 -Current"                                                                             | 14707   |

The data extraction form included details on:

- i. The development of the model (including details about the study design, the selection of participants and the variables considered for inclusion in the model)
- ii. The risk model itself, with details of the variables used and the requirements for data collection
- iii. The performance of the risk model in the development population
- iv. Any validation studies of the risk model (including study design and performance of the risk model in validation)

| First Author | Year | Journal                                                     |
|--------------|------|-------------------------------------------------------------|
| Arjumand     | 2012 | Tumor Biology                                               |
| Asal         | 1988 | Cancer detection and prevention                             |
| Chang        | 2014 | The Chinese journal of physiology                           |
| Chen         | 2011 | Asian Pacific Journal of Cancer Prevention: Apjcp           |
| Chow         | 1996 | Cancer Epidemiology, Biomarkers & Prevention                |
| Chu          | 2012 | Annals of Oncology                                          |
| Colt         | 2011 | Epidemiology                                                |
| Coric        | 2017 | Urologic Oncology: Seminars and Original Investigations     |
| Dai          | 2016 | International Journal of Clinical and Experimental Medicine |
| de Martino   | 2016 | Molecular Carcinogenesis                                    |
| Flaherty     | 2005 | Cancer Causes and Control                                   |
| Gamble       | 1996 | Environmental Health Perspectives                           |
| Haggstrom    | 2013 | PLoS ONE                                                    |
| Hofmann      | 2015 | Epidemiology                                                |
| Hsueh        | 2017 | Toxicology and Applied Pharmacology                         |
| Hsueh        | 2018 | Toxicology and Applied Pharmacology                         |
| Hu           | 2003 | Sozial- und Praventivmedizin                                |
| Hu           | 2003 | Cancer Causes & Control                                     |
| Huang        | 2011 | Journal of Urology                                          |
| Huang        | 2012 | Toxicology and Applied Pharmacology                         |
| Joh          | 2011 | Diabetes Care                                               |
| Joh          | 2012 | Cancer Epidemiology                                         |
| Joh          | 2013 | Journal of the National Cancer Institute                    |
| Kadamani     | 1989 | American Journal of Industrial Medicine                     |

|                |      |                                                  |
|----------------|------|--------------------------------------------------|
| Kollarova      | 2012 | Central European Journal of Medicine             |
| Landsman       | 2013 | Statistics in Medicine                           |
| Leiba          | 2013 | Journal of Urology                               |
| Li             | 2012 | Biostatistics                                    |
| Liao           | 2013 | Obesity                                          |
| Liao           | 2017 | Cancer Causes & Control                          |
| Lin            | 2008 | Carcinogenesis                                   |
| Machiela       | 2017 | European Urology                                 |
| MacLeod        | 2013 | Journal of Urology                               |
| Mattioli       | 2002 | Journal of Occupational & Environmental Medicine |
| McElduff       | 2002 | Journal of Clinical Epidemiology                 |
| Muscat         | 1995 | Cancer                                           |
| Parent         | 2000 | American Journal of Industrial Medicine          |
| Sanfilippo     | 2014 | Hypertension                                     |
| Scelo          | 2017 | Nature Communications                            |
| Schlehofer     | 1995 | International Journal of Epidemiology            |
| Schouten       | 2008 | Cancer Epidemiology, Biomarkers & Prevention     |
| Shea           | 2013 | Front Oncol                                      |
| Shivappa       | 2017 | Nutrition and Cancer                             |
| Shu            | 2013 | Journal of the National Cancer Institute         |
| Tavani         | 1997 | European Journal of Cancer Prevention            |
| Tremblay       | 1995 | American Journal of Industrial Medicine          |
| Van Hemelrijck | 2012 | International Journal of Cancer                  |
| Verma          | 2015 | Indian Journal of Clinical Biochemistry          |

|           |      |                                  |
|-----------|------|----------------------------------|
| Wei       | 2014 | Molecular Carcinogenesis         |
| Weikert   | 2008 | American Journal of Epidemiology |
| Wozniak   | 2015 | International Journal of Cancer  |
| Zucchetto | 2008 | International Journal of Cancer  |

**Title**

Vitamin D receptor FokI and BsmI gene polymorphism and its association with grade and stage of renal cell carcinoma in North Indian population

Risk factors in renal cell carcinoma. II. Medical history occupation multivariate analysis and conclusions

Association of caveolin-1 genotypes with renal cell carcinoma risk in Taiwan

Relationship between CYP1A1 genetic polymorphisms and renal cancer in China

Obesity and risk of renal cell cancer

Polymorphisms in the IL-13 and IL-4r genes are associated with the development of renal cell carcinoma

Hypertension and risk of renal cell carcinoma among white and black Americans

GSTM1 genotype is an independent prognostic factor in clear cell renal cell carcinoma

Association between EPAS1 gene single nucleotide polymorphisms and risk and prognosis of renal clear cell carcinoma

Association of human telomerase reverse transcriptase gene polymorphisms serum levels and telomere length with renal cell carcinoma risk and pathology

A prospective study of body mass index hypertension and smoking and the risk of renal cell carcinoma (United States)

A nested case-control study of kidney cancer among refinery/petrochemical workers

Metabolic Factors Associated with Risk of Renal Cell Carcinoma

Chronic kidney disease and risk of renal cell carcinoma: differences by race

The polymorphism XRCC1 Arg194Trp and 8-hydroxydeoxyguanosine increased susceptibility to arsenic-related renal cell carcinoma

Adiponectin gene polymorphisms and obesity increase the susceptibility to arsenic-related renal cell carcinoma

Overweight and obesity in adults and risk of renal cell carcinoma in Canada

Diet and vitamin or mineral supplements and risk of renal cell carcinoma in Canada

Effect of urinary total arsenic level and estimated glomerular filtration rate on the risk of renal cell carcinoma in a low arsenic exposure area

Urinary total arsenic and 8-hydroxydeoxyguanosine are associated with renal cell carcinoma in an area without obvious arsenic exposure

Type 2 diabetes and the risk of renal cell cancer in women

ABO blood group and risk of renal cell cancer

Predicted plasma 25-hydroxyvitamin D and risk of renal cell cancer

Occupational hydrocarbon exposure and risk of renal cell carcinoma



Analyzing selected risk factors for the development of kidney cancer  
Efficient analysis of case-control studies with sample weights

Adolescent obesity and paternal country of origin predict renal cell carcinoma: A cohort study of 1.1 million 16 to 19-year-old males

Pseudo semiparametric maximum likelihood estimation exploiting gene environment independence for population-based case-control studies with complex samples  
Serum leptin and adiponectin levels and risk of renal cell carcinoma

Circulating levels of obesity-related markers and risk of renal cell carcinoma in the PLCO cancer screening trial  
Case-control analysis of nucleotide excision repair pathway and the risk of renal cell carcinoma

Genetic Variants Related to Longer Telomere Length are Associated with Increased Risk of Renal Cell Carcinoma

Risk factors for renal cell carcinoma in the VITAL study

Occupational risk factors for renal cell cancer: a case-control study in northern Italy

Estimating the contribution of individual risk factors to disease in a person with more than one risk factor

The epidemiology of renal cell carcinoma: A second look

Occupational risk factors for renal cell carcinoma in Montreal

Hypertension and obesity and the risk of kidney cancer in 2 large cohorts of US men and women

Genome-wide association study identifies multiple risk loci for renal cell carcinoma

Occupation smoking and demographic factors and renal cell carcinoma in Germany

Alcohol consumption and mutations or promoter

hypermethylation of the von Hippel-Lindau gene in renal cell carcinoma

Alcohol consumption and mutations or promoter

hypermethylation of the von Hippel-Lindau gene in renal cell carcinoma

carcinoma

A proposal for a targeted screening program for renal cancer

Dietary Inflammatory Index and Renal Cell Carcinoma Risk in an Italian Case-Control Study

Energy balance polymorphisms in the mTOR pathway and renal cell carcinoma risk

Attributable risks for kidney cancer in northern Italy

Estimation of risk of developing bladder cancer among workers exposed to coal tar pitch volatiles in the primary aluminum industry

The interplay between lipid profiles glucose BMI and risk of kidney cancer in the Swedish AMORIS study

Genetic Variants in miRNAs Associated with Renal Cell Carcinoma (RCC) Risk: A Pilot Study in North Indian Population

MicroRNA target site polymorphisms in the VHL-HIF1alpha pathway predict renal cell carcinoma risk  
Blood pressure and risk of renal cell carcinoma in the European prospective investigation into cancer and nutrition

Alcohol consumption and the risk of renal cancers in the European prospective investigation into cancer and nutrition (EPIC)

Reproductive menstrual and other hormone-related factors and risk of renal cell cancer
